# Supplementary material for: Fish market prices drive overfishing of the ‘big ones’
Source: PeerJ. 2014 Nov 4;2:e638. doi: 10.7717/peerj.638 (PMC4226641; doi:10.7717/peerj.638)
Supplement: Supplemental Information 1 [file peerj-02-638-s001.xlsx]

## Sheet: Sheet1
	Species	Lmax (cm)	Troph	Price	Vulnerability	Landings
1	Anguilla anguilla	133	3.33	6.73283	70	1737
2	Dentex dentex	100	4.5	4.17066	67	797
3	Dicentrarchus labrax	103	3.79	4.61904	57	8938
4	Dissostichus spp.	175	4.45	3.40913	68	392
5	Engraulis encrasicolus	20	3.11	1.28262	14	168000
6	Gadus morhua	200	4.42	2.74211	65	850584
7	Hippoglossus hippoglossus	470	4.53	7.22084	88	2854
8	Hippoglossus stenolepis	267	4.13	8.35795	86	-
9	Lophius piscatorius	200	4.45	5.78969	72	29486
10	Melanogrammus aeglefinus	112	4.09	2.10422	63	320498
11	Merlangius merlangus	70	4.37	1.53107	37	35823
12	Merluccius australis	155	4.45	3.11387	52	-
13	Merluccius capensis	140	4.45	3.56926	70	-
14	Micromesistius poutassou	50	4.01	1.17566	33	1371000
15	Molva molva	200	4.25	1.70355	65	38652
16	Oncorhynchus kisutch	108	4.22	4.34798	53	-
17	Oncorhynchus mykiss	120	4.42	3.32374	36	-
18	Pagellus erythrinus	60	3.4	4.17066	54	1036
19	Pleuronectes platessa	100	3.26	2.46052	69	87047
20	Pollachius virens	130	4.38	0.990564	61	397491
21	Reinhardtius hippoglossoides	80	4.48	3.36219	73	57129
22	Sarda sarda	91.4	4.5	2.11127	33	6722
23	Sardina pilchardus	27.5	3.05	0.562757	36	314605
24	Sardinella aurita	31	3.4	1.34412	36	121391
25	Sardinops sagax	39.5	2.43	1.34412	33	-
26	Scomber australasicus	44	4.2	1.29615	43	-
27	Scomber japonicus	64	3.09	1.29615	46	107944
28	Scomber scombrus	60	3.65	1.29615	44	648512
29	Scyliorhinus canicula	100	3.69	2.66424	62	6172
30	Sebastes marinus	35	4.03	1.6667	64	52185
31	Solea solea	70	3.13	5.08302	41	31134
32	Sparus aurata	70	3.26	3.65147	35	3399
33	Sprattus sprattus	16	3	0.0059575	33	586342
34	Squalus acanthias	160	4.3	2.66273	69	-
35	Thunnus alalunga	140	4.31	3.49398	58	24273
36	Thunnus albacares	239	4.34	4.24185	46	44154
37	Thunnus maccoyii	245	3.93	9.17318	67	-
38	Thunnus obesus	250	4.49	5.36169	72	17103
39	Thunnus thynnus	458	4.43	5.55722	82	14773
40	Trachurus trachurus	70	3.64	0.974182	56	200445
41	Urophycis spp.	135	4.2	3.67616	58	823
42	Xiphias gladius	455	4.49	6.54654	72	20873
